# Supplementary material for: Evaluating the carbon inventory, carbon fluxes and carbon cycles for a long-term sustainable world
Source: Royal Society of Chemistry journal article supplement (doi:10.1039/c9gc00528e), 2019-01-01
Supplement: c9gc00528e1.pdf [file c9gc00528e1.pdf]

## Supplementary Information

### Definitions

The carbon content  $w_C$  is stated as mass fraction of carbon in the mixture, i.e. as the ratio of the mass of carbon  $m_C$  to the total mass  $m_{tot}$  of the mixture

$$w_C = \frac{m_C}{m_{tot}}$$

### Original data

**Table S4** Overview of values given for the carbon inventory.

| Definition *                                                        | Gt C                      | Ref.           |
|---------------------------------------------------------------------|---------------------------|----------------|
| Biomass on land                                                     | 650                       | <sup>89</sup>  |
| Land phytomass                                                      | $6 \times 10^2$           | <sup>88</sup>  |
| Plants                                                              | 450                       | <sup>90</sup>  |
| Subsurface bacteria                                                 | 70                        | <sup>90</sup>  |
| Subsurface archaea                                                  | 7                         | <sup>90</sup>  |
| Total for abundant taxonomic groups                                 | 550                       | <sup>90</sup>  |
| Terrestrial biosphere                                               | 625                       | ‡              |
| Soil humus                                                          | $1.5 \times 10^3$         | <sup>88</sup>  |
| Soil                                                                | 3000                      | <sup>93</sup>  |
| Soil organic carbon                                                 | $2.3 \times 10^3$         | ‡              |
| Oceanic biota                                                       | $3 \times 10^0$           | <sup>88</sup>  |
| Biomass in oceans                                                   | 3                         | <sup>89</sup>  |
| Marine zooplankton                                                  | 2                         | <sup>90</sup>  |
| Marine biota                                                        | 6                         | ‡              |
| Atmosphere                                                          | 597                       | <sup>89</sup>  |
| Atmosphere                                                          | 750                       | <sup>57</sup>  |
| Atmosphere                                                          | $7.850 \times 10^2$       | <sup>88</sup>  |
| Atmosphere                                                          | 785                       | ‡              |
| Ocean, mostly $\text{HCO}_3^-$ , $\text{CO}_3^{2-}$ , $\text{CO}_2$ | $3.8509 \times 10^4$      | <sup>88</sup>  |
| Carbonates                                                          | $6.53 \times 10^7$        | <sup>88</sup>  |
| Organic matter                                                      | $1.25 \times 10^7$        | <sup>88</sup>  |
| Fossil fuel reserves                                                | $3.5 \times 10^3$         | <sup>99</sup>  |
| Continental crust                                                   | $2.576 \times 10^6$       | <sup>88</sup>  |
| Oceanic crust                                                       | $9.200 \times 10^5$       | <sup>88</sup>  |
| Earth's crust                                                       | $6 - 8 \times 10^7$       | <sup>103</sup> |
| Upper mantle                                                        | $8.90 - 16.6 \times 10^7$ | <sup>88</sup>  |

\* As per reference; aggregated data and description used for the discussion are highlighted.

**Table S4** Cumulative values for anthropogenic emissions since the onset of industrialisation.

| Definition *                            | Gt C   | Year | Ref.          |
|-----------------------------------------|--------|------|---------------|
| Cumulative anthropogenic emissions      | 461±19 | 2000 | <sup>88</sup> |
| Cumulatively taken up by land ecosystem | 134±6  | 2000 | <sup>88</sup> |
| Cumulatively transferred to ocean       | 122±2  | 2000 | <sup>88</sup> |
| Cumulatively left in atmosphere         | 205±13 | 2000 | <sup>88</sup> |

\* As per reference

**Table S5** Overview of values given for the carbon fluxes in terrestrial processes.

| Definition *                                                   | Gt/a C    | Ref.            |
|----------------------------------------------------------------|-----------|-----------------|
| Anthropogenic emissions                                        | 7.6       | <sup>57</sup>   |
| Emitted through human activities                               | 9         | <sup>114</sup>  |
| Anthropogenic $\text{CO}_2$ emitted into atmosphere            | 9         | ‡               |
| Uptake of anthropogenic $\text{CO}_2$ by terrestrial biosphere | 2.6       | ‡               |
| Uptake terrestrial biosphere from atmosphere by photosynthesis | 120       | <sup>57</sup>   |
| Uptake terrestrial biosphere                                   | 120 - 123 | <sup>57,‡</sup> |
| Absorbed by vegetation                                         | 123       | <sup>114</sup>  |
| Plant respiration                                              | 60        | <sup>114</sup>  |
| Cellular respiration                                           | 60        | ‡               |
| Decaying biomass and respiration of animals                    | 60        | <sup>114</sup>  |
| Sequestration in soil                                          | 3         | <sup>114</sup>  |

\* As per reference; aggregated data and description used for the discussion are highlighted.

**Table S6** Overview of values given for the carbon fluxes in oceanic processes.

| Definition *                                                      | Gt/a C   | Ref.            |
|-------------------------------------------------------------------|----------|-----------------|
| Exchange with oceans                                              | 90       | <sup>57</sup>   |
| Uptake of carbon by oceanic biosphere from surrounding water body | 108      | <sup>89</sup>   |
| Uptake of anthropogenic $\text{CO}_2$ by oceans                   | 2.2      | ‡               |
| Absorption by photosynthetic organisms                            | 92       | <sup>114</sup>  |
| Uptake oceanic biosphere                                          | 92 - 108 | <sup>‡,89</sup> |
| Respiration and decay                                             | 90       | <sup>114</sup>  |
| Metabolized in upper layer of ocean                               | 78       | ‡               |
| Sinking particles (detritus)                                      | 11       | ‡               |
| Carbon sequestration in the oceans                                | 2        | <sup>114</sup>  |
| Bound by carbonate-producing plankton                             | 1        | ‡               |
| Organic carbon in the sediment                                    | <0.1     | ‡               |

\* As per reference; aggregated data and description used for the discussion are highlighted.

**Table S7** Overview of values given for the carbon fluxes in geologic processes.

| Definition *                                           | Gt/a C          | Ref.           |
|--------------------------------------------------------|-----------------|----------------|
| Chemical weathering                                    | 0.233-0.288     | <sup>118</sup> |
| Accumulation of CaCO <sub>3</sub> on sea floor         | 0.38            | ‡              |
| Long term burial of organic carbon                     | 0.144           | ‡              |
| Retention of carbon along subduction interfaces        | 0.0005-0.0020   | <sup>119</sup> |
| Carbon sequestered by serpentized forearc mantle wedge | 0.00162-0.00485 | <sup>119</sup> |
| Subduction of dolomite                                 | 0.002-0.005     | ‡              |
| Initially subducted sediments                          | 0.040-0.115     | <sup>119</sup> |
| Volcanic activity                                      | 0.13            | <sup>114</sup> |
| Carbon returned by arc volcanoes                       | 0.018-0.043     | <sup>119</sup> |

\* As per reference; aggregated data and description used for the discussion are highlighted.

## Notes and references

For references see the main article.
